# Supplementary material for: Fungal Perspective of Pine and Oak Colonization in Mediterranean Degraded Ecosystems
Source: MDPI journal article supplement (doi:10.3390/f13010088), 2022-01-08
Supplement: s1 [file s1]

## Supplementary material

**Table S1.** Fungal biomass values for the forest and mine experiment. Fungal biomass was obtained multiplying the total biomass by the relative abundance of each functional guild. Ps = *P. sylvestris*, Qr = *Q. robur*.

| Forest<br>type (no.<br>of plots) | Range | Total<br>biomass<br>(ppb) | Mycorrhizal<br>biomass | Saprotrophic<br>biomass |
|----------------------------------|-------|---------------------------|------------------------|-------------------------|
| Ps                               | Min.  | 479                       | 31                     | 25                      |
| (9)                              | Mean  | 1752                      | 271                    | 268                     |
|                                  | Max.  | 3104                      | 639                    | 607                     |
| Qr                               | Min.  | 95                        | 30                     | 10                      |
| (9)                              | Mean  | 575                       | 58                     | 88                      |
|                                  | Max.  | 1753                      | 115                    | 283                     |
| Forest                           | Min.  | 554                       | 2                      | 23                      |
| (12)                             | Mean  | 1231                      | 7                      | 203                     |
|                                  | Max.  | 1600                      | 21                     | 495                     |
| Plain                            | Min   | 752                       | 29                     | 38                      |
| (12)                             | Mean  | 1263                      | 132                    | 99                      |
|                                  | Max.  | 1949                      | 334                    | 200                     |
